# Supplementary material for: NLRP3 licenses NLRP11 for inflammasome activation in human macrophages
Source: PubMed Central journal article supplement (PMC9174058; doi:10.1038/s41590-022-01220-3), 2022-05-27
Supplement: 41590_2022_1220_MOESM2_ESM.pdf [file 41590_2022_1220_MOESM2_ESM.pdf]

**Figure 1c**

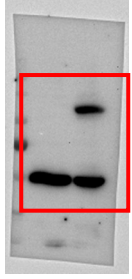

NLRP11

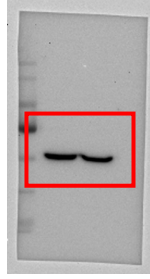

Tubulin

**Figure 1k**

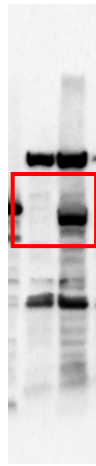

myc

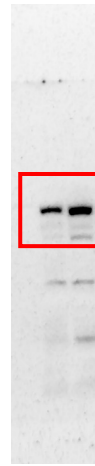

vinculin
